# Supplementary material for: Biological Control of the Chagas Disease Vector Triatoma infestans with the Entomopathogenic Fungus Beauveria bassiana Combined with an Aggregation Cue: Field, Laboratory and Mathematical Modeling Assessment
Source: PLoS Negl Trop Dis. 2015 May 13;9(5):e0003778. doi: 10.1371/journal.pntd.0003778 (PMC4430541; doi:10.1371/journal.pntd.0003778)
Supplement: S1 File — (DOCX) [file pntd.0003778.s001.docx]

**S1 File**

***Algebraic and numerical matrix representation of the life cycle diagram of Fig.2.***

P1 0 0 0 0 0 F 0 0 0 0 0 F*

G1P2*(1-f2) 0 0 0 0 0 0 0 0 0 0 0

0 G2*(1-f2) P3*(1-f3) 0 0 0 0 0 0 0 0 0 0

0 0 G3*(1-f3) P4*(1-f4) 0 0 0 0 0 0 0 0 0

0 0 0 G4*(1-f4) P5*(1-f5) 0 0 0 0 0 0 0 0

0 0 0 0 G5*(1-f5) P6*(1-f6) 0 0 0 0 0 0 0

0 0 0 0 0 G6*(1-f6) P7*(1-f7) 0 0 0 0 0 0

0 P2*f2 0 0 0 0 0 P2****θ***2 0 0 0 0 0

0 0 P3*f3 0 0 0 0 G2****θ***2P3****θ***3 0 0 0 0

0 0 0 P4*f4 0 0 0 0 G3****θ***3P4****θ***4 0 0 0

0 0 0 0 P5*f5 0 0 0 0 G4****θ***4P5****θ***5 0 0

0 0 0 0 0 P6*f6 0 0 0 0 G5****θ***5P6****θ***6 0

0 0 0 0 0 0 P7*f7 0 0 0 0 G6****θ***6P7****θ***7

| 0.9474 | 0 | 0 | 0 | 0 | 0 | 0.86 | 0 | 0 | 0 | 0 | 0 | 0.51 |
| --- | --- | --- | --- | --- | --- | --- | --- | --- | --- | --- | --- | --- |
| 0.0437 | 0.9293 | 0 | 0 | 0 | 0 | 0 | 0 | 0 | 0 | 0 | 0 | 0 |
| 0 | 0.0425 | 0.9378 | 0 | 0 | 0 | 0 | 0 | 0 | 0 | 0 | 0 | 0 |
| 0 | 0 | 0.0357 | 0.9460 | 0 | 0 | 0 | 0 | 0 | 0 | 0 | 0 | 0 |
| 0 | 0 | 0 | 0.0284 | 0.9542 | 0 | 0 | 0 | 0 | 0 | 0 | 0 | 0 |
| 0 | 0 | 0 | 0 | 0.0212 | 0.9630 | 0 | 0 | 0 | 0 | 0 | 0 | 0 |
| 0 | 0 | 0 | 0 | 0 | 0.0131 | 0.9743 | 0 | 0 | 0 | 0 | 0 | 0 |
| 0 | 0.0206 | 0 | 0 | 0 | 0 | 0 | 0.3404 | 0 | 0 | 0 | 0 | 0 |
| 0 | 0 | 0.0208 | 0 | 0 | 0 | 0 | 0.0156 | 0.5000 | 0 | 0 | 0 | 0 |
| 0 | 0 | 0 | 0.0210 | 0 | 0 | 0 | 0 | 0.0190 | 0.5861 | 0 | 0 | 0 |
| 0 | 0 | 0 | 0 | 0.0211 | 0 | 0 | 0 | 0 | 0.0176 | 0.8098 | 0 | 0 |
| 0 | 0 | 0 | 0 | 0 | 0.0213 | 0 | 0 | 0 | 0 | 0.0180 | 0.8551 | 0 |
| 0 | 0 | 0 | 0 | 0 | 0 | 0.0216 | 0 | 0 | 0 | 0 | 0.0116 | 0.8966 |

**Figure A.** Symbolic projection matrix for a *T. infestans* population with infected and non-infected individuals and the probability transitions among them. The asterisk represents the multiplication operation (except for F*, that represented the fecundity of infected females). Symbols and parameter identification are given in the main text.

**Figure B.** Numerical projection matrix for a *T. infestans* population with infected and non-infected individuals and the probability transitions among them. This matrix is shown only for the purpose of illustration, and corresponds to the symbolic matrix of Fig. 1 for the following parameter values: number of boxes = *n* = 1, box efficacy = 0.1, horizontal transmission rate = *r* = 0.01825, probability of one box attracting an individual per unit time = *cn*= α = 0.0355, force of attraction of all boxes = *f* = 0.02167.
